# Supplementary material for: Direct formation of hydrophilic honeycomb film by self-assembly in breath figure templating of hydrophobic polylacticacid/ionic surfactant complexes
Source: Royal Society of Chemistry journal article supplement (doi:10.1039/c9sm00845d), 2019-01-01
Supplement: c9sm00845d1.pdf [file c9sm00845d1.pdf]

## Electronic Supporting Information *for*

### **Direct formation of hydrophilic honeycomb film by self-assembly in breath figure templating of hydrophobic polylacticacid/ionic surfactant complexes**

Hongyao Yin,<sup>a</sup> Fuxing Zhan,<sup>a</sup> Yue Yu,<sup>a</sup> Zongcheng Li,<sup>a</sup> Yujun Feng<sup>\*a</sup> and Laurent Billon<sup>\*b,c</sup>

<sup>a</sup> Polymer Research Institute, State Key Laboratory of Polymer Materials Engineering, Sichuan University, Chengdu 610065, PR China. E-mail: yjfeng@scu.edu.cn; Tel: +86 28 85 40 80 37

<sup>b</sup> IPREM, E2S/Université de Pau & Pays Adour, CNRS UMR 5254, 2 Avenue du President Angot, Pau F-64053, France

<sup>c</sup> Bio-inspired Materials Group, Functionality & Self-assembly, Université de Pau & Pays Adour, 2 avenue du President Angot, Pau F-64053, France. E-mail: laurent.billon@univ-pau.fr; Tel: +33 05 59 40 76 09

## Additional results

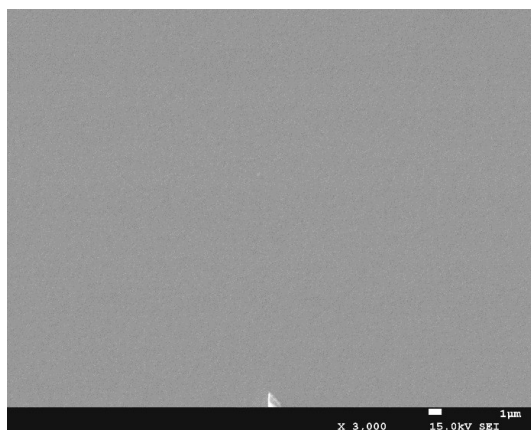

**Fig. S1** SEM image of PD2 continuous film. The scale bar is 1  $\mu\text{m}$ . The film is quite flat and no pores were observed.

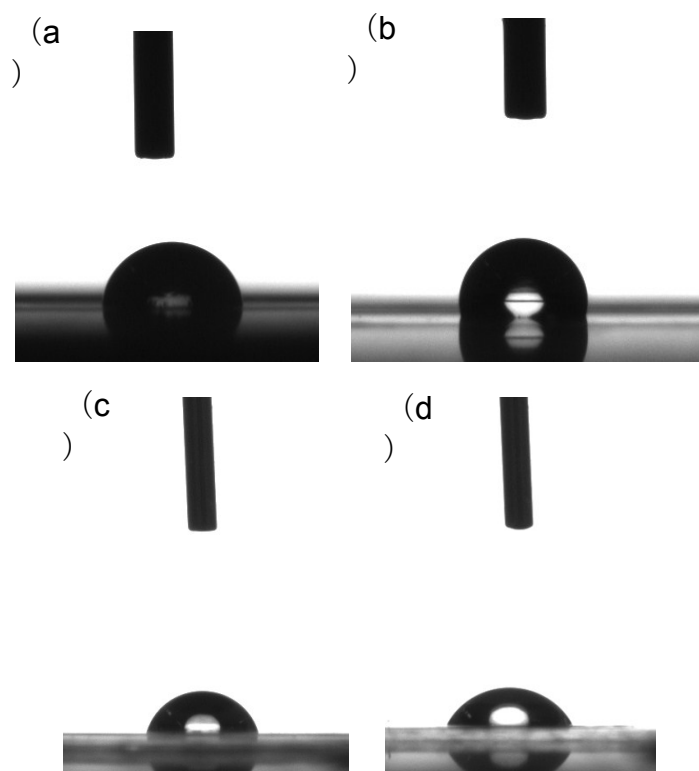

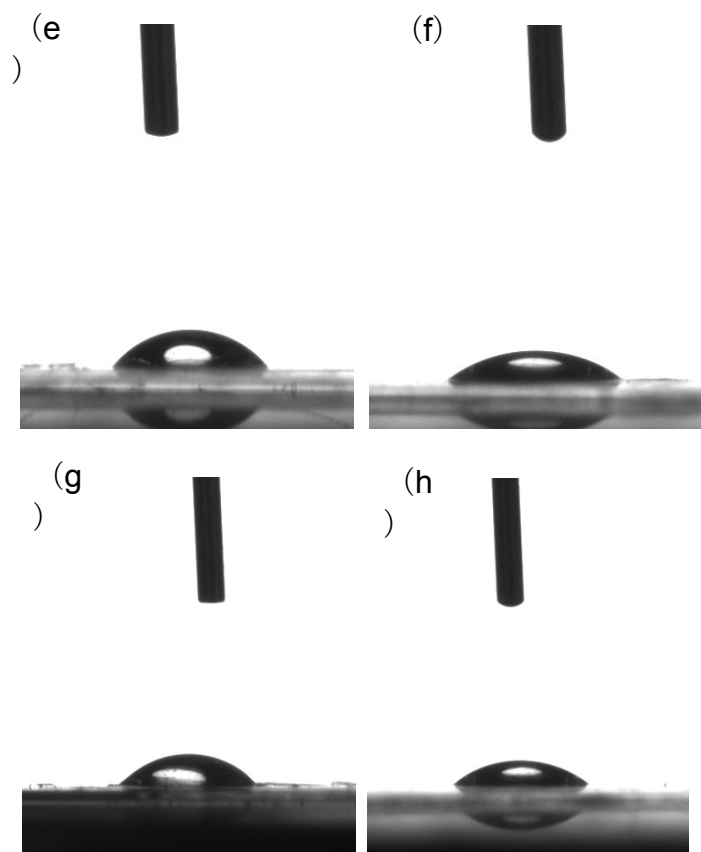

**Fig. S2** Snapshots of a water droplet on different films. (a) PLA continuous film; (b) PLA porous film; (c) PD1 continuous film; (d) PD1 honeycomb film; (e) PD2 continuous film; (f) PD2 honeycomb film; (g) PD3 continuous film; (h) PD3 honeycomb film.
